# Supplementary material for: Inconsistency in ferritin reference intervals across laboratories: a major concern for clinical decision making
Source: publisher site journal article supplement (doi:10.1515/cclm-2024-0826), 2024-10-11
Supplement: Supplementary file 2 [file j_cclm-2024-0826_suppl_001.docx]

**Supplementary Table 1. The ferritin reference intervals used by Dutch laboratories.**

L indicates the laboratory with the lowest, and H the highest reference limit of all the laboratories using the same platform. Lab-B, indicates laboratory using Beckman, Lab-A indicates laboratory using Abbott, Lab-S indicates laboratory using Siemens, Lab-R indicates laboratory using Roche platform. Insert refers to the reference intervals mentioned in the package insert of ferritin measurement of the company.

| Laboratory | Lower reference limit (µg/L) | | | Upper reference limit (µg/L) | | |
| --- | --- | --- | --- | --- | --- | --- |
|  | Male ≥18 years | Female 18-50 years | Female >50 years | Male ≥18 years | Female 18-50 years | Female >50 years |
| Beckman (B) insert | 24 | 11 | 11 | 336 | 307 | 307 |
| Lab-B1 | 24 (L) | 11 (L) | 11 (L) | 336 (H) | 307 (H) | 307 (H) |
| Lab-B2 | 25 (H) | 20 (H) | 20 (H) | 250 (L) | 150 (L) | 250 (L) |
| Abbot (A) insert | 22 | 5 | 5 | 275 | 204 | 204 |
| Lab-A1 | 25 (H) | 10 (L) | 10 (L) | 275 (H) | 200 | 200 |
| Lab-A2 | 25 (H) | 15 | 15 | 250 (L) | 150 (L) | 150 (L) |
| Lab-A3 | 20 (L) | 15 | 15 | 250 (L) | 150 (L) | 150 (L) |
| Lab-A4 | 22 | 15 | 15 | 275 (H) | 204 (H) | 204 (H) |
| Lab-A5 | 22 | 22 (H) | 22 (H) | 275 (H) | 204 (H) | 204 (H) |
| Siemens (S) insert | 22 | 10 | 10 | 322 | 291 | 291 |
| Lab-S1 | 12 (L) | 6 (L) | 6 (L) | 170 (L) | 85 (L) | 85(L) |
| Lab-S2 | 22 | 10 | 10 | 320 | 290 | 290 |
| Lab-S3-5 | 22 | 10 | 10 | 322 (H) | 291 (H) | 291 (H) |
| Lab-S6 | 21 | 10 | 10 | 288 | 260 | 260 |
| Lab-S7-8 | 22 | 10 | 15 | 300 | 150 | 270 |
| Lab-S9 | 15 | 15 | 15 | 200 | 150 | 150 |
| Lab-S10 | 25 (H) | 20 (H) | 20 (H) | 250 | 150 | 150 |
| Lab-S11 | 25 (H) | 20 (H) | 20 (H) | 250 | 150 | 250 |
| Roche (R)  insert | 30 | 13 | 13 | 400 | 150 | 150 |
| Lab-R1 | 20 | 8 (L) | 8 (L) | 280 | 110 | 110 (L) |
| Lab-R2 | 10 (L) | 10 | 10 | 300 | 300 (H) | 300 |
| Lab-R3 | 20 | 10 | 10 | 250 | 175 | 175 |
| Lab-R4 | 30 | 10 | 10 | 240 (L) | 140 | 140 |
| Lab-R5 | 35 (H) | 10 | 10 | 260 | 150 | 150 |
| Lab-R6 | 20 | 10 | 20 | 300 | 200 | 300 |
| Lab-R7 | 20 | 10 | 20 | 300 | 200 | 300 |
| Lab-R8 | 30 | 10 | 20 | 300 | 100 (L) | 200 |
| Lab-R9 | 30 | 10 | 20 | 300 | 100 (L) | 300 |
| Lab-R10 | 30 | 10 | 30 | 350 | 150 | 350 |
| Lab-R11 | 27 | 10 | 30 | 300 | 130 | 300 |
| Lab-R12-16 | 30 | 13 | 13 | 400 (H) | 150 | 150 |
| Lab-R17 | 30 | 13 | 18 | 400 (H) | 150 | 370 |
| Lab-R18-20 | 30 | 13 | 30 | 400 (H) | 150 | 400 (H) |
| Lab-R21-22 | 30 | 13 | 13 | 400 (H) | 150 | 150 |
| Lab-R23 | 30 | 15 | 15 | 400 (H) | 130 | 130 |
| Lab-R24 | 30 | 15 | 15 | 400 (H) | 200 | 200 |
| Lab-R25 | 30 | 15 | 40 (H) | 400 (H) | 150 | 250 |
| Lab-R26 | 30 | 15 | 15 | 400 (H) | 150 | 150 |
| Lab-R27-28 | 25 | 20 | 20 | 250 | 150 | 150 |
| Lab-R29-30 | 25 | 20 | 20 | 250 | 150 | 250 |
| Lab-R31 | 30 | 20 | 20 | 400 (H) | 150 | 150 |
| Lab-R32 | 20 | 20 | 20 | 250 | 250 | 250 |
| Lab-R33 | 25 | 20 | 25 | 250 | 250 | 250 |
| Lab-R34 | 30 | 30 (H) | 30 | 350 | 150 | 150 |
